# Supplementary material
Source: Springer Nature journal article supplement (https://www.springermedizin.de/resource/supplementary/13017_2008_99_MOESM5_ESM.pdf/9635466)

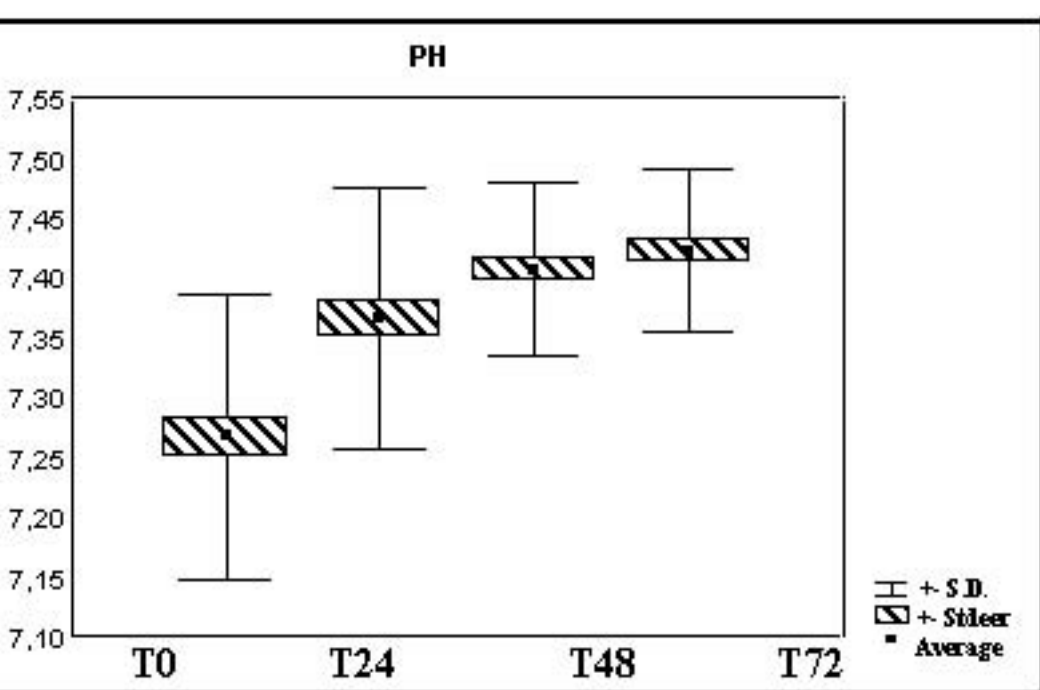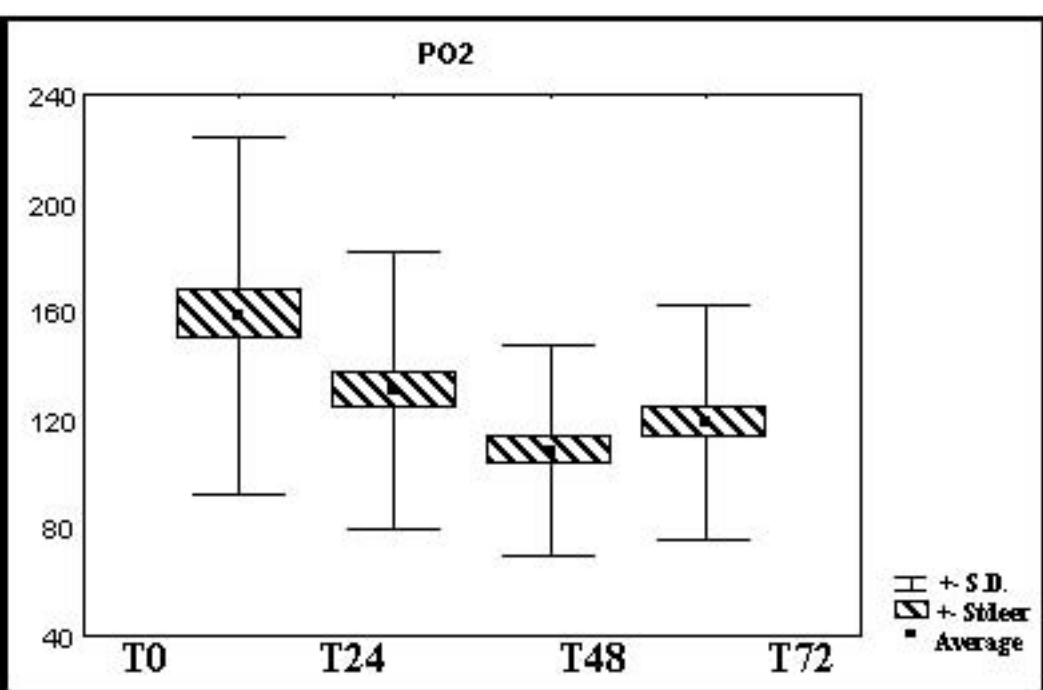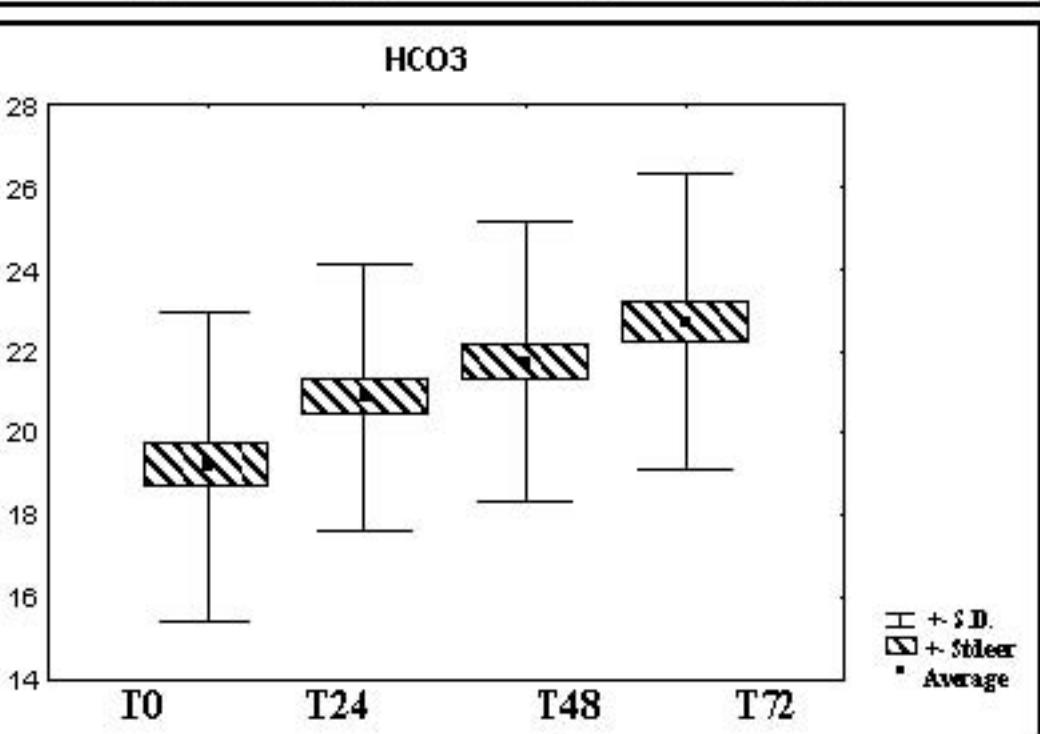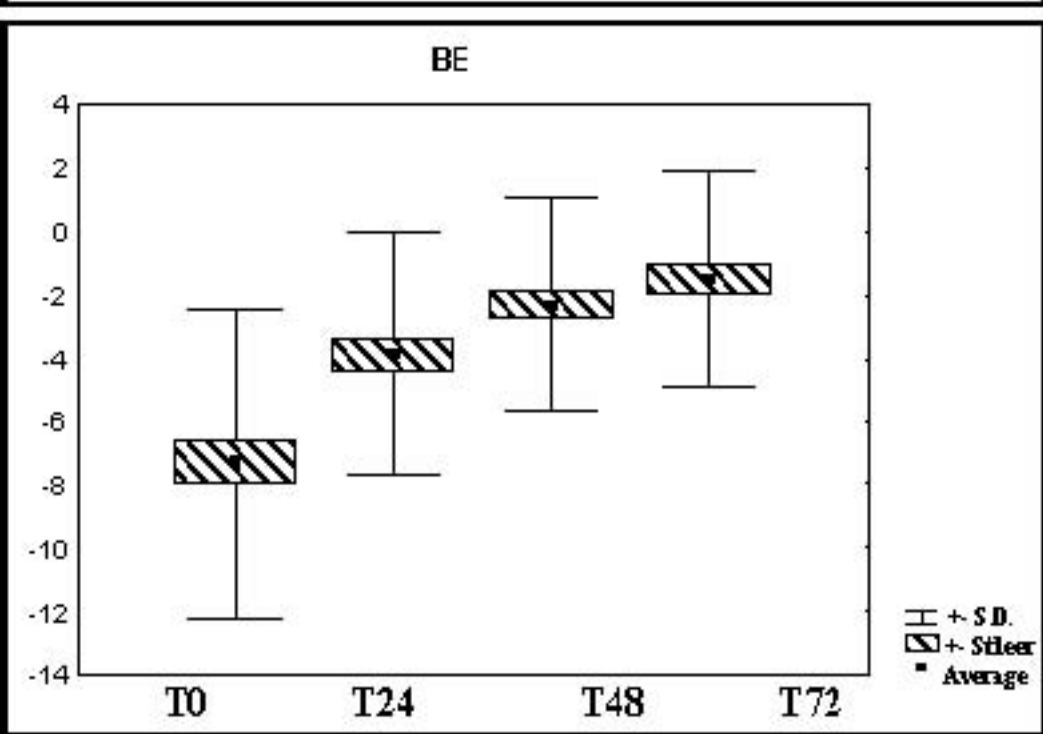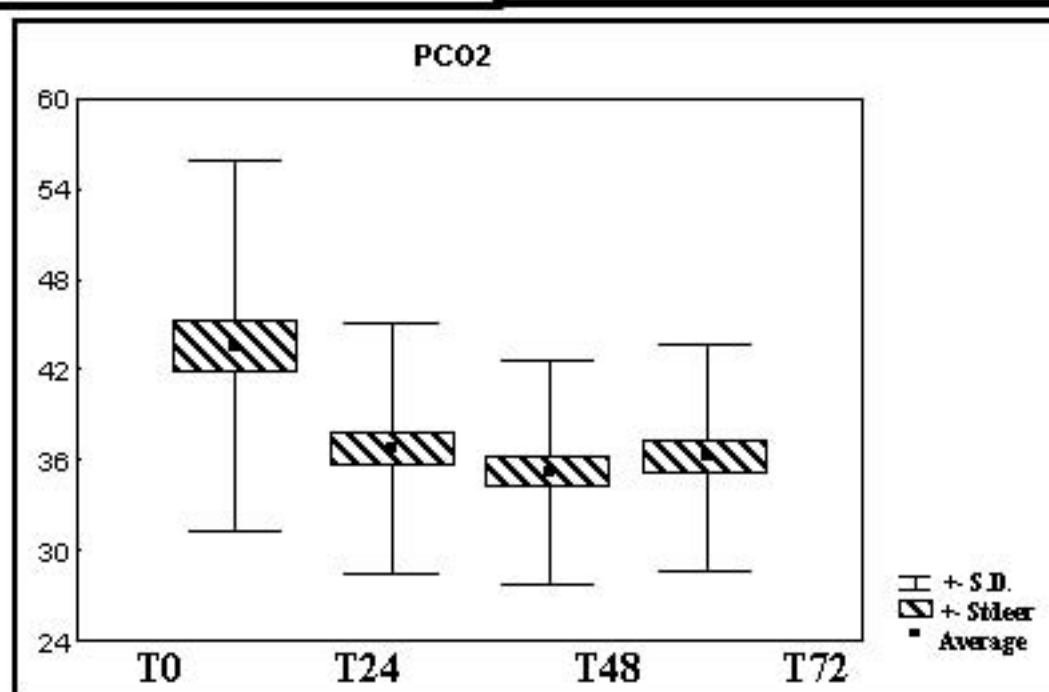

**Legend:**

- S.D.: Standard deviation
- Stdeer: Standard error

Supplement: MOESM5 [file 9635466]
